1 A Dysbiotic Gut Microbiome Suppresses Antibody Mediated-Protection Against *Vibrio cholerae*

2

3 John Macbeth<sup>a,b</sup>, Ansel Hsiao<sup>a#</sup>

4 <sup>a</sup>Department of Microbiology and Plant Pathology, University of California, Riverside, Riverside,

5 California, USA

6 <sup>b</sup>Division of Biomedical Sciences, University of California, Riverside, Riverside, California, USA

7

8 Running Head: Microbial Dysbiosis Suppresses Immunization Responses

9

10 #Address correspondence to: Ansel Hsiao, [ansel.hsiao@ucr.edu](mailto:ansel.hsiao@ucr.edu)

11

12 Abstract and Importance Word Count: 299

13

14 Text Word Count: 4,258

15 **Abstract**

16 *Vibrio cholerae* is the etiologic agent of cholera, a severe diarrheal disease that represents a  
17 significant burden on global health and productivity. Despite the pressing need, available  
18 preventative measures such as oral cholera vaccines exhibit highly variable protective efficacy.  
19 We hypothesized that one contributor to vaccine efficacy variability across geographical regions  
20 may be due to differences in gut microbiome, which in cholera-endemic areas is strongly and  
21 repeatedly modulated by malnutrition, cholera, and non-cholera infectious diarrhea. Here, we  
22 assemble representative model communities of either human gut microbes resembling those of  
23 healthy individuals or those of individuals recovering from diarrhea or malnutrition. We  
24 establish these communities in a murine immunization model, and show that the dysbiotic gut  
25 microbiome, commonly present in areas where malnutrition and diarrhea are common,  
26 suppresses the immune response against *Vibrio cholerae* through the action of CD4<sup>+</sup> cells. Our  
27 findings suggest that the composition of the gut microbiome at time of immunization may be  
28 pivotal for providing robust immunity from oral cholera vaccines, and highlight the importance  
29 of the gut microbiome on mucosal immunization responses and vaccine development  
30 strategies.

31

32 **Importance**

33 Diarrhea caused by enteric bacterial pathogens is a recurring and important issue for worldwide  
34 health. Cholera, the severe watery diarrhea caused by the bacterium *Vibrio cholerae*, affects  
35 millions of people annually. Currently, there is a lack of effective preventative measures for  
36 cholera, due to the uneven performance of oral cholera vaccines. Thus, it is essential to better

37 understand the factors that may affect vaccine efficacy. One aspect may be variations in the  
38 resident community of gut microbes, the gut microbiome, across populations living in  
39 developed versus developing regions as a function of host genetics, diet, and infection. Our  
40 findings suggest that specific structures of the gut microbiome are involved in disrupting the  
41 immune responses to *V. cholerae* vaccination.

42

## 43 Introduction

44 *Vibrio cholerae* is the etiologic agent of cholera, a severe diarrheal disease affecting  
45 approximately 3 million people annually, resulting in over 100,000 deaths (1). *V. cholerae*  
46 preferentially colonizes the small intestine, where it releases cholera toxin (CT), which causes  
47 profuse watery diarrhea and loss of electrolytes. While the advent of oral rehydration therapy  
48 has dramatically reduced mortality from cholera, recent major outbreaks in Yemen and Haiti  
49 are reminders of the pressing global public health need to improve cholera prevention  
50 strategies. Several oral cholera vaccines (OCVs) have been developed, though they have  
51 demonstrated high variance in protective efficacy in field trials (2). While OCVs have been  
52 shown to have an efficacy of generally 80%-90% in developed countries, large field studies in  
53 developing regions range from 14-50% efficacy (3-7). Two main types of OCVs have been  
54 developed, whole-cell killed and live-attenuated. The whole-cell killed vaccine, Dukoral,  
55 consisted of inactivated strains of O1 Classical and El Tor biotype *V. cholerae* as well as  
56 recombinant cholera toxin subunit B, the non-enzymatic subunit of cholera toxin (7). Dukoral  
57 showed 50% efficacy in all age groups in a Bangladesh field trial (3), while demonstrating  
58 significant vibriocidal titers (a clinical correlate of protection) in 89% of volunteers in the US (4).  
59 Another whole-cell killed vaccine, Shanchol, is composed of various O1 Classical and El Tor  
60 strains as well as one O139 strain (7). In children aged 1-5 years in Kolkata, the vaccine had an  
61 efficacy of 43% after 5 years compared to 65% in the 5-15 years of age group (8, 9). The only  
62 OCV to be approved by the FDA in the United States, Vaxchora, comprises a live-attenuated O1  
63 Classical Inaba strain, with 94% of the *ctxA* gene encoding the enzymatic subunit of CT deleted  
64 and replaced by a mercury-resistance cassette, while leaving the *ctxB* gene intact. While the

65 vaccine was safe and immunogenic in US trials (10), it had a less than desirable outcome of 14%  
66 protection in a large Bangladesh field trial (6).

67 We hypothesized that one contributor to this high level of geographical variation in OCV  
68 efficacy may be variations in the microbial populations of the gut, the gut microbiome. Several  
69 studies have shown that gut bacterial populations can change due to diet and geography (11,  
70 12), especially when comparing populations in the United States and Europe versus those in  
71 developing countries (13-15). While the presence of a normal murine microbiome has been  
72 implicated in antibody responses against viral vaccines (16), the effects of a human gut  
73 microbiome on responses to *V. cholerae* or other enteropathogenic bacteria have not been  
74 well determined. To begin to address this question, we have assembled human fecal bacterial  
75 communities that are representative of either bacteria that are commonly found in healthy  
76 human guts (17) or bacteria prevalent in malnutrition or diarrhea endemic regions based on  
77 existing 16S ribosomal DNA amplicon surveys (11, 18). Here, we show that dysbiotic gut  
78 bacterial populations at time of *V. cholerae* immunization dampen antigen-specific antibody  
79 responses against *V. cholerae* in a CD4<sup>+</sup>-cell-dependent manner. These findings suggest that gut  
80 bacterial composition at time of immunization may impact adaptive immune responses to *V.*  
81 *cholerae* and may be applicable to other enteric pathogens as well.

82

## 83 Results

84 To begin to examine the role of human microbiome structure on vaccination outcomes, we  
85 established model human fecal communities in adult CD-1 mice. Preclinical studies in animal  
86 models are essential to understand the intricate mechanisms of vaccine protection. There are  
87 several animal models for studying *V. cholerae*, the most widely used being the infant mouse  
88 cholera model (19). However, while the suckling animals can be used to study *Vibrio*  
89 colonization and virulence, they are poorly suited for immunological studies, as the infant  
90 mouse does not have a fully developed adaptive immune system, a limitation shared by the  
91 recently developed infant rabbit model of cholera (20, 21). Others have utilized germ-free adult  
92 mice to evaluate immune responses to *V. cholerae* (22), but there may be limitations to this  
93 approach as well because there are no microbial-immune system interactions at birth, which  
94 are critical to a robust development of adaptive immunity (23). However, depletion of the  
95 murine microflora is critical to examining the effects of human microbial communities, as  
96 mouse-adapted microbes rapidly out-compete non-murine communities (24). Thus, we used  
97 antibiotics to treat adult animals (25) in order to allow the introduction of human gut  
98 communities in an immune-competent animal system. Adult CD-1 mice were treated with an  
99 antibiotic cocktail for 1 week (See Materials and Methods) and then switched to streptomycin  
100 treatment alone 3 days before the gavage (Fig. 1A). The mice were then gavaged with  $\sim 5 \times 10^9$   
101 CFU of *V. cholerae* C6706 O1 El Tor. We observed that antibiotic treatment was critical to  
102 eliciting antibody responses against immunization (Fig. 1B). Serum vibriospecific ELISA showed  
103 that levels of IgG3 and IgM, strong complement fixing antibodies, were decreased in the NM  
104 group as compared to the DM group (Fig 1C).

105           We then moved to establish human gut communities in these antibiotic cleared mice. As  
106 a proof of principle, we constructed simplified defined communities of human gut isolates,  
107 designed on the basis of metagenomic surveys of individuals in cholera-endemic areas, but  
108 nonetheless simple enough to be easily and reproducibly deployed in numerous animal  
109 experiments. We constructed two embodiments, the NM microbiome, broadly representative  
110 of healthy microbiomes (13, 26) and the DM model microbiome, which closely resembled  
111 dysbiotic human gut microbial communities in areas affected by malnutrition and diarrhea,  
112 including cholera (11, 17, 18, 27) (Table S1).

113           At 2 weeks post introduction of *V. cholerae* the mice were switched to ampicillin,  
114 neomycin, and vancomycin in drinking water. We re-introduced strong antibiotic control of  
115 microbial growth in these animals for two reasons. First, we wanted to remove *V. cholerae* so  
116 that potentially varying levels of antigen present over time would not affect immune responses;  
117 germ-free adult mice show sustained colonization, while human gut microbial communities  
118 have been shown to affect colonization levels in mice (17). Shedding of *V. cholerae* in Vaxchora  
119 recipients has been minimal, and continued bacterial carriage for any vaccine is  
120 disadvantageous for safety reasons (28). In addition, we wanted to remove the introduced  
121 human microbiomes after they had had the opportunity to influence responses to *V. cholerae*,  
122 and before any potential long-term fluctuations in the community can induce  
123 immunomodulatory effects on the host. We reasoned that this approach also more closely  
124 approaches practice in vaccine deployment in humans in endemic areas. Individuals suffering  
125 from malnutrition and various forms of infectious diarrheas in Bangladesh have demonstrated a  
126 strong but transient shift in fecal microbial composition to the DM community structure (18).

127 This temporary dysbiosis is likely to affect a substantial portion of human vaccine recipients,  
128 and has not served as an exclusion criteria for prior vaccine trials.

129 At 4 weeks post introduction of *V. cholerae*, serum and fecal samples were collected  
130 from immunized mice containing NM and DM human microbiomes. To evaluate the efficacy of  
131 anti-*V. cholerae* antibody responses, we used a serum vibriocidal assay, which is considered to  
132 be the best clinical correlate of protection for cholera (29-32). The vibriocidal titer is the  
133 reciprocal of the highest dilution of serum at which killing of *V. cholerae* is observed with the  
134 addition of exogenous complement. Briefly, serum from immunized animals is heat-inactivated  
135 and diluted in two-fold steps, after which a mixture of guinea pig complement and *V. cholerae*  
136 are added to each serum sample. After incubation, *V. cholerae* growth is observed by plating on  
137 selective solid medium. In humans, a clinically successful seroconversion as a result of  
138 vaccination is defined as a more than four-fold rise in serum vibriocidal titers compared to  
139 baseline pre-immune titer over two weeks , although there is no defined titer at which  
140 protection can be considered to be definitively achieved (33). We observed that serum from  
141 animals bearing the (DM) microbiome at time of infection exhibited a statistically significant  
142 reduction in serum vibriocidal activity compared to that from animals immunized in the  
143 presence of the (NM) microbiome (Fig 2), suggesting that the presence of members of the  
144 dysbiotic community at time of immunization may hinder the development of a robust serum  
145 antibody response.

146 Although the vibriocidal assay represents a good correlate of protection in humans, we  
147 used a passive protection assay to determine a more functional measure of the activity of  
148 antibody generated by immunized animals. While serum vibriocidal activity is mostly due to the



149 action of IgG and IgM, protection from infection is thought to be primarily mediated by  
150 secreted antibodies, especially secretory antibodies at the site of infection, i.e. the intestinal  
151 mucosa. During the course of infection, class-switching to IgA and the secretion of antigen-  
152 specific secretory IgA (s-IgA) serves as the main means of protection by binding to *V. cholerae*  
153 and preventing pathogen access to epithelium, and neutralizing cholera toxin (34). A recent  
154 study highlights the capacity of a monoclonal IgA antibody to inhibit *V. cholerae* motility,  
155 preventing access to the intestinal epithelium (35). IgA is not likely to be well reflected in  
156 serum; the bulk of IgA in the body is secretory IgA (s-IgA) secreted in gram quantities onto the  
157 mucosa (36). To obtain this secreted antibody from vaccinated animals, fecal immunoglobulin  
158 from both NM and DM animals was purified using a Protein L Purification Kit (Pierce). These  
159 antibody pools were predominantly IgA with low levels of IgM (Fig 3A). Purified Ig from both  
160 groups was combined with *V. cholerae* grown overnight and incubated for 1 hour before being  
161 gavaged into 4-day old infant CD-1 mice. Suckling animals were used as conventionally-reared  
162 adult animals are highly resistant to *V. cholerae* colonization (37, 38). After 18 hours of  
163 infection, the small intestines were homogenized and plated on selective medium. We  
164 observed that pre-treatment with antibody from animals bearing the dysbiotic microbiome led  
165 to colonization nearly 2-log greater than pre-infection treatment with antibody from animals  
166 with the NM microbiome (Fig. 3B). Taken together, these findings suggested that oral  
167 immunization in a DM microbiome context lead to a significantly less effective anti-*Vibrio*  
168 antibody response.

169 To determine whether the NM or DM phenotype would be dominant when the bacterial  
170 communities are combined, we immunized mice with *V. cholerae* in the presence of either NM,

171 DM, or NM+DM microbiomes. At 4 weeks post immunization, the NM+DM group showed a low  
172 serum vibriocidal titer comparable with the DM group, while the NM group had significantly  
173 higher titer levels (Fig. 4A). These data suggested that the dysbiotic microbiome may have a  
174 role in suppressing the antibody response against *V. cholerae*.

175         Due to the reduced vibriocidal titer levels observed in the NM+DM group, we wanted to  
176 determine whether or not live members of the susceptible community were required to  
177 mediate this effect. Accordingly, we heat inactivated all the members of the respective  
178 communities and again immunized mice with live *V. cholerae*. When we heat inactivated our  
179 bacterial communities, we observed that the serum vibriocidal titer increased in the DM group  
180 to similar levels with the NM group (Fig. 4B). These findings suggest that live members of the  
181 dysbiotic community are necessary at time of immunization in order to mediate suppression of  
182 anti-*Vibrio* antibody protection.

183         In general, the mechanistic immune responses to OCVs remains to be fully determined.  
184 The initial response appears to be driven by TLR-2 interactions that can cause CD4<sup>+</sup>  
185 proliferation, and it has been shown that CD4<sup>+</sup> T cells are also instrumental in stimulating long-  
186 term memory B cell responses (39-42). We therefore further examined the role of CD4<sup>+</sup> T cells  
187 in the context of our DM-mediated suppression of anti-*V. cholerae* antibody responses by  
188 depleting CD4<sup>+</sup> cells in mice co-inoculated with *V. cholerae* and model human microbiomes.  
189 Adult CD-1 mice were intraperitoneally injected with anti-CD4 monoclonal antibodies every 4  
190 days during antibiotic treatment. After verifying depletion of CD4<sup>+</sup> cells by flow cytometry  
191 analysis of serum (Fig. 5A-B), animals were gavaged with live defined microbial communities  
192 and *V. cholerae* as previously mentioned. Levels of serum anti-*V. cholerae* IgA were severely

193 reduced in both groups (Fig 5C), while there were no significant differences in levels of serum  
194 IgG and IgM. Strikingly, vibriocidal titer in the DM group increased to levels comparable to the  
195 NM group after CD4<sup>+</sup> cell depletion (Fig. 5D). This level was also comparable to that observed in  
196 NM group without depletion, suggesting that CD4<sup>+</sup> cells are not required for the development  
197 of serum vibriocidal responses. These results suggest that in serum, the primary vibriocidal  
198 antibodies are not IgA isotype, and further support for a model whereby the presence of a  
199 dysbiotic gut microbiome at time of introduction of antigen leads suppression of subsequent  
200 development of specific antibody responses.

201

## 202 Discussion

203 Efficacy of vaccination against enteric pathogens has been shown to be highly variable on a  
204 geographical and per-study basis, including for rotavirus (43), Salmonella (44), polio(45), and  
205 cholera (2). One of the potential reasons for the variability may be due to interpersonal  
206 variations in gut microbiomes (46). Previous studies sought to identify the relative abundance  
207 of certain species that were either positively or negatively correlated with protection, but were  
208 unable to translate these findings into an experimental model of vaccine efficacy. Using  
209 microbiome replacement in antibiotic-treated mice, our experiments suggest that the  
210 composition of the human gut microbiome at time of immunization suppresses the antibody-  
211 mediated immune response against *V. cholerae*. We observed that the presence of the  
212 dysbiotic community at time of immunization was sufficient to dampen antibody-mediated  
213 protection. Since this required live, as opposed to heat-killed, DM community organisms, these  
214 data suggest that certain microbiome structures are actively suppressive of responses to  
215 vaccination. There are relatively few studies that have looked at how a community in dysbiosis  
216 may alter the humoral immune response. One study shows that *Sutterella* species are capable  
217 of degrading the stabilizing peptide of sIgA, leading to decreased levels of IgA (47). The  
218 mechanism in our studies is likely different, as our microbial populations are only transiently  
219 present, and overall antibody levels are comparable across different model microbiomes.

220 While in humans, the gut microbiome enters a DM-like state transiently after infectious  
221 diarrhea, repeated infection by multiple pathogens, from cholera to pathogenic *Escherichia coli*  
222 and rotavirus, means that this state is much more frequently attained in cholera-endemic areas  
223 (11, 17, 18). Malnutrition, another common public health concern often co-occurring with

224 recurrent infectious diarrhea, induces a DM-like state for much longer periods, and is refractory  
225 to therapeutic nutritional intervention (48). Our DM model community is also similar to the  
226 DM-like community state in humans due to its dramatically lower diversity; human  
227 microbiomes during fulminant diarrhea and early recovery from diarrhea can be dominated by  
228 99% *Streptococcus* species by relative abundance (17). The definition for what constitutes a  
229 truly “healthy” microbiome is not settled. While our NM model community is very broadly  
230 reflective of healthy human communities by higher taxonomy levels, interpersonal and  
231 temporal intrapersonal variation in healthy individuals can potentially lead to other effects on  
232 vaccination outcome not fully captured by our NM-replacement model. More studies with  
233 complex human fecal communities will be necessary to probe temporal variations in  
234 interactions between the host and the broad range of microbiome structures seen in healthy  
235 humans.

236         Our antibiotic treated adult mouse experimental system is a robust model to study gut  
237 microbiota interactions in the host. In contrast to previous studies (22), we are able to  
238 transplant actual human microbes into an immune-competent animal system, shortening the  
239 loop from initial observations to potentially clinically-relevant conclusions. In contrast,  
240 germfree mice have limitations for immune studies; ‘dirty’ mice such as feral and pet store mice  
241 display a more mature immune response due to more complete microbial exposure and  
242 consequent immune development (49, 50).

243         To begin teasing apart the host mechanism behind this microbiome-dependent antibody  
244 response phenotype, we examined the role of CD4<sup>+</sup> T cells. Upon depletion of CD4<sup>+</sup> cells, we  
245 observed decreased levels of serum IgA after immunization in both NM and DM mice,

246 potentially indicating decreased seroconversion (Fig. 5C). However, serum vibriocidal titer in  
247 DM, CD4<sup>+</sup>-depleted animals increased to levels comparable to the NM mice (Fig. 5D). These  
248 data show that CD4<sup>+</sup> cells are integral in mediating microbiome-dependent changes in an  
249 immunization-induced antibody response. These results are surprising as one would expect  
250 CD4<sup>+</sup> T cell depletion to substantially reduce the vibriocidal titer but our data suggests that  
251 there are compensatory, non-CD4<sup>+</sup> mediated mechanisms to aid in seroconversion. A recent  
252 clinical study evaluating the efficacy of the oral cholera vaccine Shanchol in human  
253 immunodeficiency virus (HIV)-infected individuals demonstrated that while vibriocidal titer was  
254 lower in HIV-infected individuals with depleted CD4<sup>+</sup> T-cell populations there was still  
255 seroconversion in 65-74% of the subjects (51). While the study population was not completely  
256 depleted of CD4<sup>+</sup> T cells, it demonstrates vibriocidal titers can be elicited even in a highly-CD4<sup>+</sup>  
257 cell-depleted state, albeit to a lesser degree.

258         In order to more fully understand the correlations between bacterial communities, *V.*  
259 *cholerae*, and host interactions, more work will need to be done to study the biochemical  
260 underpinnings of microbiome-host interaction as it impacts vaccination. The interface between  
261 DM microbes and the immune system is yet to be defined; the inability of heat-killed DM  
262 communities to influence vaccine outcomes suggest that an active interaction with host tissue,  
263 or the production of active compounds *in vivo* are required for this. At the host level, while we  
264 investigated the role of CD4<sup>+</sup> T cells in this phenotype, other immune cell types such as antigen  
265 presenting cells may act as more direct intermediaries between host immunity and microbial  
266 composition. Helper T cells are integral in stimulating and guiding B cell responses, so it would

267 be beneficial to further define CD4<sup>+</sup> subsets involved such as follicular helper T cells or  
268 regulatory T cells as well as B-cell subtypes.

269           Taken together, our data advances how bacterial dysbiosis may alter the immune  
270 pathways resulting in a weakened humoral response. Ultimately, our studies on the influence of  
271 bacterial composition at time of *V. cholerae* immunization will help delineate the contributors  
272 to the high variability that occurs in oral cholera vaccines as well as other mucosal vaccines. Our  
273 results suggest that the gut microbiome may represent a personalized target for improving  
274 vaccination outcome.

275

276

277

278

279

280

281

282

283 **Methods**

284

285 **Animals**

286 Female CD-1 mice were purchased from Charles River Laboratories, and generally used at 5-9

287 weeks of age. 4-day old suckling CD-1 mice were purchased from Charles River Laboratories.

288 Animals in the study were treated and housed under specific-pathogen-free conditions. All

289 animal protocols were approved by University of California, Riverside's Institutional Animal

290 Care and Use Committee.

291

292 **Bacterial strains and growth conditions:**

293 All human gut commensal strains used are listed in Table S1. Unless otherwise noted, human

294 gut strains were propagated in LYHBHI liquid medium (BHI supplemented to 5g/L yeast extract,

295 5mg/L hemin, 1mg/mL cellobiose, 1mg/mL maltose and 0.5mg/mL cysteine-HCl). Cultures were

296 then grown in a Coy anaerobic chamber (atmosphere 5% H<sub>2</sub>, 20% CO<sub>2</sub>, balance N<sub>2</sub>) or

297 aerobically at 37°C. All *V. cholerae* strains were derived from the C6706 El Tor pandemic isolate

298 and propagated in LB media with appropriate antibiotics at 37°C.

299

300 **Preparation of bacteria for inoculation into antibiotic treated mice**

301 Female adult CD-1 mice were given an antibiotic cocktail *ad libidum* (1 g/L ampicillin, 1 g/L

302 neomycin, and 125 mg/L vancomycin)(52, 53), and for 1 week as described previously with

303 modifications as mice refrained from drinking water with metronidazole (54). 2.5 g/L of Splenda

304 was added as well to make the cocktail more palatable. 3 days prior to gavage with *V. cholerae*,



305 the cocktail was replaced with 2.5 g/L streptomycin and 2.5 g/L Splenda. Each anaerobic human  
306 gut bacterium was cultured from glycerol stocks in LYHBHI media for 24 hours at 37°C, and then  
307 diluted (1:50) in fresh LYHBHI media. *Enterococcus faecalis* and *Escherichia coli* were grown  
308 aerobically in LYHBHI and LB, respectively, for 24 hours at 37°C, and then diluted (1:50) in  
309 respective media. After growth for an additional 48 hours, cultures were normalized for density  
310 by OD<sub>600</sub>. For inoculation into adult mice, normalized mixtures were prepared so the equivalent  
311 total of 300 µL of OD<sub>600</sub>=0.4 culture divided evenly across the respective strains for each  
312 community was pooled, centrifuged, and resuspended in LYHBHI. The suspension was prepared  
313 so that each mouse received 50 µL of the bacterial community mixture, as well as 50 µL  
314 containing ~5 x 10<sup>9</sup> *V. cholerae* O1 El Tor C6706. Prior to bacterial introduction, the mice were  
315 fasted for 3 hours and then gavaged with 100 µL of 1 M NaHCO<sub>3</sub>, to buffer stomach acid, after  
316 which the bacterial communities and *V. cholerae* were inoculated via oral gavage.

317

### 318 **Serum vibriocidal assay:**

319 Mouse whole blood was collected via tail vein bleeds using heparinized Caraway collection  
320 tubes (Fisher Scientific). Blood was centrifuged at 9,000 x g for 10 minutes, and the serum  
321 fraction was isolated and stored at -20°C. The vibriocidal titer measurement was done as  
322 previously described with minor modifications (55). In brief, mouse serum was heat inactivated  
323 for 30 minutes at 56°C. The heat-inactivated serum was then serially diluted two-fold with  
324 phosphate-buffered saline (PBS). Separately, PBS, guinea pig complement serum (Sigma-  
325 Aldrich), and ~ 5 x 10<sup>8</sup> CFU *V. cholerae* were combined at a ratio of 7:2:1, respectively. The  
326 above mixture was then added to the wells containing serially diluted serum and incubated at

327 37°C for two hours. The resulting dilutions were then plated onto streptomycin (200 µg/mL) LB  
328 plates. The vibriocidal titer is the reciprocal of the highest serum dilution which displayed no *V.*  
329 *cholerae* growth.

330 An additional measure of vibriocidal activity was used by observing the levels of *V.*  
331 *cholerae* remaining after being treated with serum. 25 µL of  $5 \times 10^7$  CFU *V. cholerae* from an  
332 overnight culture was combined with 5 µL serum from the respective groups and 20 µL of PBS.  
333 After binding for 1 hour, 5 µL exogenous guinea pig complement was added, and the mixture  
334 incubated at 37°C for two hours. Afterward, surviving *V. cholerae* were enumerated by serial  
335 dilution and plating on streptomycin LB agar.

336

### 337 **Fecal Pellet Collection**

338 Fresh fecal pellets were collected from mice, weighed, and placed in 600 µL of PBS in a 2.0 mL  
339 screw cap tube. The pellets were disrupted by agitation without beads in a bead beater  
340 (BioSpec) for 30 seconds at 1400 RPM. 10-fold serial dilutions of the resulting fecal slurry were  
341 then plated onto LB agar with streptomycin to enumerate *V. cholerae* colonization.

342

### 343 **Analysis of antibody responses by ELISA**

344 100 µL dense overnight culture of *V. cholerae* grown in LB was plated onto high-binding, clear,  
345 flat bottom Costar 96 well plates (Corning, Inc) ELISA plates and allowed to bind overnight. 3%  
346 bovine serum albumin (BSA) in PBS was used as a blocking solution. Alternatively, to measure  
347 total antibody levels, serum was added at a 1:100 dilution to plates previously coated with  
348 unlabeled goat anti-mouse IgA, IgG, IgM (Southern Biotech) and allowed to bind at 37°C for 3

349 hours. Next, the plates were washed with PBS with 0.001% Tween-20 and PBS. 100  $\mu$ L of goat  
350 anti-mouse HRP conjugated antibodies of either IgA, IgG<sub>1,2A,2B,3</sub> or IgM (Southern Biotech) were  
351 added to 96 well plates at a dilution of 1:4,000 in 3% BSA and incubated overnight at 4°C. After  
352 several washes, the plates were developed with the addition of 5 mg o-phenylenediamine  
353 dihydrochloride (Thermo Scientific) and stable peroxide substrate buffer (Thermo Scientific); 1  
354 N HCl was used as a stop solution. The plates were read at 490 nm on a Synergy HTX multi-  
355 mode reader (BioTek).

356

#### 357 **Passive immune protection assay:**

358 Fecal samples from immunized animals bearing the NM and DM communities was collected and  
359 processed as described previously. Total IgA/IgM fecal antibody was purified using Protein L  
360 magnetic beads according to the manufacturer's protocol (Pierce Biotech). 50 ng of pure  
361 antibody was bound to  $\sim 1.25 \times 10^6$  CFU *V. cholerae* and allowed to bind at 37°C for 1 hour. 4-  
362 day old suckling CD-1 mice were gavaged with 30-gauge plastic tubing with 50  $\mu$ L of antibody/*V.*  
363 *cholerae* mixture. After 18 hours of infection, the animals were sacrificed, and intestines  
364 homogenized for *V. cholerae* CFU enumeration on selective medium.

365

#### 366 **Preparation of heat-killed commensal bacteria**

367 Strains from the NM and DM communities were grown in pure cultures and the bacterial  
368 suspension was prepared as previously mentioned. The respective bacterial communities were  
369 killed by heating in a heat block for 1 hour at 100°C. Bacterial death was confirmed by plating  
370 onto solid media and observing lack of growth.

371

372 ***In vivo* depletion of CD4<sup>+</sup> cells**

373 In order to deplete CD4<sup>+</sup> cells *in vivo*, 50  $\mu$ L of GK1.5 antibody (Bio X Cell) was administered  
374 intraperitoneally every four days at a concentration of 100  $\mu$ g/mL. Depletion of CD4<sup>+</sup> cells in  
375 blood was confirmed using a FACS Canto flow cytometer (BD Biosciences) and FITC rat-anti-  
376 mouse CD4 (BD Biosciences). Red blood cell lysis was done using ACK lysis buffer and CD16/32  
377 was used as an Fc block. Analysis was done using Flow Jo (BD Biosciences) and Prism  
378 (GraphPad). Mice were treated with ampicillin, neomycin, and vancomycin as previously  
379 mentioned. 3 days prior to infection, the mice were placed on streptomycin water alone. The  
380 mice were infected with  $\sim 5 \times 10^9$  CFU *V. cholerae* and serum vibriospecific ELISAs and  
381 vibriocidal assays were performed as previously described.

382

383 **Acknowledgments**

384 These studies were funded via a grant from the National Institutes of Health (R35 GM124724).

385 The funders had no role in study design, data collection and interpretation, or the decision to

386 submit the work for publication.

387

388 We would like to thank Jonathan Mitchell, Salmasadat Alavi, Jennifer Cho, and Rui Liu for advice

389 and support. We would also like to thank Dr. Meera Nair for helpful discussions as well as

390 Kristina Bergersen and Dr. Emma Wilson for assistance with flow cytometry.

391

392

## 393 **References**

- 394 1. Ali M, Nelson AR, Lopez AL, Sack DA. 2015. Updated global burden of cholera in endemic  
395 countries. *PLoS Negl Trop Dis* 9:e0003832.
- 396 2. Levine MM. 2010. Immunogenicity and efficacy of oral vaccines in developing countries:  
397 lessons from a live cholera vaccine. *BMC biology* 8:129.
- 398 3. Clemens JD, Sack DA, Harris JR, Van Loon F, Chakraborty J, Ahmed F, Rao MR, Khan MR,  
399 Yunus M, Huda N, et al. 1990. Field trial of oral cholera vaccines in Bangladesh: results  
400 from three-year follow-up. *Lancet* 335:270-3.
- 401 4. Black RE, Levine MM, Clements ML, Young CR, Svennerholm AM, Holmgren J. 1987.  
402 Protective efficacy in humans of killed whole-vibrio oral cholera vaccine with and  
403 without the B subunit of cholera toxin. *Infect Immun* 55:1116-20.
- 404 5. Levine MM, Kaper JB, Herrington D, Ketley J, Losonsky G, Tacket CO, Tall B, Cryz S. 1988.  
405 Safety, immunogenicity, and efficacy of recombinant live oral cholera vaccines, CVD 103  
406 and CVD 103-HgR. *Lancet* 2:467-70.
- 407 6. Richie EE, Punjabi NH, Sidharta YY, Peetosutan KK, Sukandar MM, Wasserman SS,  
408 Lesmana MM, Wangsasaputra FF, Pandam SS, Levine MM, O'Hanley PP, Cryz SJ,  
409 Simanjuntak CH. 2000. Efficacy trial of single-dose live oral cholera vaccine CVD 103-HgR  
410 in North Jakarta, Indonesia, a cholera-endemic area. *Vaccine* 18:2399-2410.
- 411 7. Bishop AL, Camilli A. 2011. *Vibrio cholerae*: lessons for mucosal vaccine design. *Expert*  
412 *review of vaccines* 10:79-94.
- 413 8. Sur D, Kanungo S, Sah B, Manna B, Ali M, Paisley AM, Niyogi SK, Park JK, Sarkar B, Puri  
414 MK, Kim DR, Deen JL, Holmgren J, Carbis R, Rao R, Nguyen TV, Han SH, Attridge S,

- 415 Donner A, Ganguly NK, Bhattacharya SK, Nair GB, Clemens JD, Lopez AL. 2011. Efficacy  
416 of a low-cost, inactivated whole-cell oral cholera vaccine: results from 3 years of follow-  
417 up of a randomized, controlled trial. *PLoS Negl Trop Dis* 5:e1289.
- 418 9. Bhattacharya SK, Sur D, Ali M, Kanungo S, You YA, Manna B, Sah B, Niyogi SK, Park JK,  
419 Sarkar B, Puri MK, Kim DR, Deen JL, Holmgren J, Carbis R, Dhingra MS, Donner A, Nair  
420 GB, Lopez AL, Wierzba TF, Clemens JD. 2013. 5 year efficacy of a bivalent killed whole-  
421 cell oral cholera vaccine in Kolkata, India: a cluster-randomised, double-blind, placebo-  
422 controlled trial. *Lancet Infect Dis* 13:1050-6.
- 423 10. Chen WH, Greenberg RN, Pasetti MF, Livio S, Lock M, Gurwith M, Levine MM. 2014.  
424 Safety and immunogenicity of single-dose live oral cholera vaccine strain CVD 103-HgR,  
425 prepared from new master and working cell banks. *Clinical and vaccine immunology* :  
426 *CVI* 21:66-73.
- 427 11. Subramanian S, Huq S, Yatsunenکو T, Haque R, Mahfuz M, Alam MA, Benezra A,  
428 DeStefano J, Meier MF, Muegge BD, Barratt MJ, VanArendonk LG, Zhang Q, Province  
429 MA, Petri WA, Jr., Ahmed T, Gordon JI. 2014. Persistent gut microbiota immaturity in  
430 malnourished Bangladeshi children. *Nature* 510:417-21.
- 431 12. Yatsunenکو T, Rey FE, Manary MJ, Trehan I, Dominguez-Bello MG, Contreras M, Magris  
432 M, Hidalgo G, Baldassano RN, Anokhin AP, Heath AC, Warner B, Reeder J, Kuczynski J,  
433 Caporaso JG, Lozupone CA, Lauber C, Clemente JC, Knights D, Knight R, Gordon JI. 2012.  
434 Human gut microbiome viewed across age and geography. *Nature* 486:222-227.
- 435 13. Qin J, Li R, Raes J, Arumugam M, Burgdorf KS, Manichanh C, Nielsen T, Pons N, Levenez  
436 F, Yamada T, Mende DR, Li J, Xu J, Li S, Li D, Cao J, Wang B, Liang H, Zheng H, Xie Y, Tap J,

- 437 Lepage P, Bertalan M, Batto J-MM, Hansen T, Le Paslier D, Linneberg A, Nielsen HB,  
438 Pelletier E, Renault P, Sicheritz-Ponten T, Turner K, Zhu H, Yu C, Li S, Jian M, Zhou Y, Li Y,  
439 Zhang X, Li S, Qin N, Yang H, Wang J, Brunak S, Doré J, Guarner F, Kristiansen K,  
440 Pedersen O, Parkhill J, Weissenbach J, et al. 2010. A human gut microbial gene catalogue  
441 established by metagenomic sequencing. *Nature* 464:59-65.
- 442 14. Costea PI, Hildebrand F, Arumugam M, Backhed F, Blaser MJ, Bushman FD, de Vos WM,  
443 Ehrlich SD, Fraser CM, Hattori M, Huttenhower C, Jeffery IB, Knights D, Lewis JD, Ley RE,  
444 Ochman H, O'Toole PW, Quince C, Relman DA, Shanahan F, Sunagawa S, Wang J,  
445 Weinstock GM, Wu GD, Zeller G, Zhao L, Raes J, Knight R, Bork P. 2018. Publisher  
446 Correction: Enterotypes in the landscape of gut microbial community composition. *Nat*  
447 *Microbiol* 3:388.
- 448 15. Arumugam M, Raes J, Pelletier E, Le Paslier D, Yamada T, Mende DR, Fernandes GR, Tap  
449 J, Bruls T, Batto JM, Bertalan M, Borruel N, Casellas F, Fernandez L, Gautier L, Hansen T,  
450 Hattori M, Hayashi T, Kleerebezem M, Kurokawa K, Leclerc M, Levenez F, Manichanh C,  
451 Nielsen HB, Nielsen T, Pons N, Poulain J, Qin J, Sicheritz-Ponten T, Tims S, Torrents D,  
452 Ugarte E, Zoetendal EG, Wang J, Guarner F, Pedersen O, de Vos WM, Brunak S, Dore J,  
453 Meta HITC, Antolin M, Artiguenave F, Blottiere HM, Almeida M, Brechot C, Cara C,  
454 Chervaux C, Cultrone A, Delorme C, Denariáz G, et al. 2011. Enterotypes of the human  
455 gut microbiome. *Nature* 473:174-80.
- 456 16. Oh JZ, Ravindran R, Chassaing B, Carvalho FA, Maddur MS, Bower M, Hakimpour P, Gill  
457 KP, Nakaya HI, Yarovinsky F, Sartor RB, Gewirtz AT, Pulendran B. 2014. TLR5-mediated



- 458 sensing of gut microbiota is necessary for antibody responses to seasonal influenza  
459 vaccination. *Immunity* 41:478-492.
- 460 17. Hsiao A, Ahmed AM, Subramanian S, Griffin NW, Drewry LL, Petri WA, Haque R, Ahmed  
461 T, Gordon JI. 2014. Members of the human gut microbiota involved in recovery from  
462 *Vibrio cholerae* infection. *Nature* 515:423-426.
- 463 18. David LA, Weil A, Ryan ET, Calderwood SB, Harris JB, Chowdhury F, Begum Y, Qadri F,  
464 LaRocque RC, Turnbaugh PJ. 2015. Gut microbial succession follows acute secretory  
465 diarrhea in humans. *mBio* 6:15.
- 466 19. Klose KE. 2000. The suckling mouse model of cholera. *Trends Microbiol* 8:189-91.
- 467 20. Ritchie JM, Rui H, Bronson RT, Waldor MK. 2010. Back to the future: studying cholera  
468 pathogenesis using infant rabbits. *MBio* 1.
- 469 21. Hubbard TP, Billings G, Dorr T, Sit B, Warr AR, Kuehl CJ, Kim M, Delgado F, Mekalanos JJ,  
470 Lewnard JA, Waldor MK. 2018. A live vaccine rapidly protects against cholera in an  
471 infant rabbit model. *Sci Transl Med* 10.
- 472 22. Butterton JR, Ryan ET, Shahin RA, Calderwood SB. 1996. Development of a germfree  
473 mouse model of *Vibrio cholerae* infection. *Infection and immunity* 64:4373-4377.
- 474 23. Hapfelmeier S, Lawson MA, Slack E, Kirundi JK, Stoel M, Heikenwalder M, Cahenzli J,  
475 Velykoredko Y, Balmer ML, Endt K, Geuking MB, Curtiss R, 3rd, McCoy KD, Macpherson  
476 AJ. 2010. Reversible microbial colonization of germ-free mice reveals the dynamics of  
477 IgA immune responses. *Science* 328:1705-9.
- 478 24. Seedorf H, Griffin NW, Ridaura VK, Reyes A, Cheng J, Rey FE, Smith MI, Simon GM,  
479 Scheffrahn RH, Woebken D, Spormann AM, Van Treuren W, Ursell LK, Pirrung M,

- 480 Robbins-Pianka A, Cantarel BL, Lombard V, Henrissat B, Knight R, Gordon JI. 2014.  
481 Bacteria from diverse habitats colonize and compete in the mouse gut. *Cell* 159:253-66.
- 482 25. Nygren E, Li BLL, Holmgren J, Attridge SR. 2009. Establishment of an adult mouse model  
483 for direct evaluation of the efficacy of vaccines against *Vibrio cholerae*. *Infection and*  
484 *immunity* 77:3475-3484.
- 485 26. McNulty NP, Yatsunenkov T, Hsiao A, Faith JJ, Muegge BD, Goodman AL, Henrissat B,  
486 Oozeer R, Cools-Portier S, Gobert G, Chervaux C, Knights D, Lozupone CA, Knight R,  
487 Duncan AE, Bain JR, Muehlbauer MJ, Newgard CB, Heath AC, Gordon JI. 2011. The  
488 impact of a consortium of fermented milk strains on the gut microbiome of gnotobiotic  
489 mice and monozygotic twins. *Sci Transl Med* 3:106ra106.
- 490 27. Kieser S, Sarker SA, Sakwinska O, Foata F, Sultana S, Khan Z, Islam S, Porta N,  
491 Combremont S, Betrisey B, Fournier C, Charpagne A, Descombes P, Mercenier A, Berger  
492 B, Brussow H. 2018. Bangladeshi children with acute diarrhoea show faecal microbiomes  
493 with increased *Streptococcus* abundance, irrespective of diarrhoea aetiology. *Environ*  
494 *Microbiol* 20:2256-2269.
- 495 28. Wong KK, Burdette E, Mahon BE, Mintz ED, Ryan ET, Reingold AL. 2017.  
496 Recommendations of the Advisory Committee on Immunization Practices for Use of  
497 Cholera Vaccine. *MMWR Morb Mortal Wkly Rep* 66:482-485.
- 498 29. Harris JB. 2018. Cholera: Immunity and Prospects in Vaccine Development. *J Infect Dis*  
499 218:S141-S146.
- 500 30. Sow SO, Tapia MD, Chen WH, Haidara FC, Kotloff KL, Pasetti MF, Blackwelder WC, Traore  
501 A, Tamboura B, Doumbia M, Diallo F, Coulibaly F, Onwuchekwa U, Kodio M, Tennant

- 502 SM, Reymann M, Lam DF, Gurwith M, Lock M, Yonker T, Smith J, Simon JK, Levine MM.  
503 2017. Randomized, Placebo-Controlled, Double-Blind Phase 2 Trial Comparing the  
504 Reactogenicity and Immunogenicity of a Single Standard Dose to Those of a High Dose  
505 of CVD 103-HgR Live Attenuated Oral Cholera Vaccine, with Shanchol Inactivated Oral  
506 Vaccine as an Open-Label Immunologic Comparator. *Clin Vaccine Immunol* 24.
- 507 31. Qadri F, Chowdhury MI, Faruque SM, Salam MA, Ahmed T, Begum YA, Saha A, Alam MS,  
508 Zaman K, Seidlein LV, Park E, Killeen KP, Mekalanos JJ, Clemens JD, Sack DA, Group P.  
509 2005. Randomized, controlled study of the safety and immunogenicity of Peru-15, a live  
510 attenuated oral vaccine candidate for cholera, in adult volunteers in Bangladesh. *The*  
511 *Journal of infectious diseases* 192:573-579.
- 512 32. Haney DJ, Lock MD, Simon JK, Harris J, Gurwith M. 2017. Antibody-Based Correlates of  
513 Protection Against Cholera Analysis of a Challenge Study in a Cholera-Naive Population.  
514 *Clin Vaccine Immunol* doi:10.1128/CVI.00098-17.
- 515 33. Kanungo S, Desai SN, Saha J, Nandy RK, Sinha A, Kim DR, Bannerjee B, Manna B, Yang JS,  
516 Ali M, Sur D, Wierzba TF. 2015. An Open Label Non-inferiority Trial Assessing Vibriocidal  
517 Response of a Killed Bivalent Oral Cholera Vaccine Regimen following a Five Year  
518 Interval in Kolkata, India. *PLoS Negl Trop Dis* 9:e0003809.
- 519 34. Apter FM, Michetti P, Winner LS, 3rd, Mack JA, Mekalanos JJ, Neutra MR. 1993. Analysis  
520 of the roles of antilipopolysaccharide and anti-cholera toxin immunoglobulin A (IgA)  
521 antibodies in protection against *Vibrio cholerae* and cholera toxin by use of monoclonal  
522 IgA antibodies in vivo. *Infect Immun* 61:5279-85.

- 523 35. Levinson KJ, De Jesus M, Mantis NJ. 2015. Rapid effects of a protective O-  
524 polysaccharide-specific monoclonal IgA on *Vibrio cholerae* agglutination, motility, and  
525 surface morphology. *Infect Immun* 83:1674-83.
- 526 36. Macpherson AJ, Geuking MB, McCoy KD. 2012. Homeland security: IgA immunity at the  
527 frontiers of the body. *Trends in immunology* 33:160-167.
- 528 37. Olivier V, Salzman NH, Satchell KJ. 2007. Prolonged colonization of mice by *Vibrio*  
529 *cholerae* El Tor O1 depends on accessory toxins. *Infect Immun* 75:5043-51.
- 530 38. Olivier V, Queen J, Satchell KJ. 2009. Successful small intestine colonization of adult mice  
531 by *Vibrio cholerae* requires ketamine anesthesia and accessory toxins. *PLoS One*  
532 4:e7352.
- 533 39. Kuchta A, Rahman T, Sennott EL, Bhuyian TR, Uddin T, Rashu R, Chowdhury F, Kahn AI,  
534 Arifuzzaman M, Weil AA, Podolsky M, LaRocque RC, Ryan ET, Calderwood SB, Qadri F,  
535 Harris JB. 2011. *Vibrio cholerae* O1 infection induces proinflammatory CD4+ T-cell  
536 responses in blood and intestinal mucosa of infected humans. *Clin Vaccine Immunol*  
537 18:1371-7.
- 538 40. Sirskyj D, Kumar A, Azizi A. 2016. Mechanisms Underlying the Immune Response  
539 Generated by an Oral *Vibrio cholerae* Vaccine. *Int J Mol Sci* 17.
- 540 41. Weil AA, Arifuzzaman M, Bhuiyan TR, LaRocque RC, Harris AM, Kendall EA, Hossain A,  
541 Tarique AA, Sheikh A, Chowdhury F, Khan AI, Murshed F, Parker KC, Banerjee KK, Ryan  
542 ET, Harris JB, Qadri F, Calderwood SB. 2009. Memory T-cell responses to *Vibrio cholerae*  
543 O1 infection. *Infect Immun* 77:5090-6.

- 544 42. Bhuiyan TR, Lundin SB, Khan AI, Lundgren A, Harris JB, Calderwood SB, Qadri F. 2009.  
545 Cholera caused by *Vibrio cholerae* O1 induces T-cell responses in the circulation. *Infect*  
546 *Immun* 77:1888-93.
- 547 43. Harris VC, Armah G, Fuentes S, Korpela KE, Parashar U, Victor JC, Tate J, de Weerth C,  
548 Giaquinto C, Wiersinga WJ, Lewis KD, de Vos WM. 2017. Significant Correlation Between  
549 the Infant Gut Microbiome and Rotavirus Vaccine Response in Rural Ghana. *J Infect Dis*  
550 215:34-41.
- 551 44. Eloe-Fadrosch EA, McArthur MA, Seekatz AM, Drabek EF, Rasko DA, Sztein MB, Fraser  
552 CM. 2013. Impact of oral typhoid vaccination on the human gut microbiota and  
553 correlations with s. Typhi-specific immunological responses. *PLoS One* 8:e62026.
- 554 45. Huda MN, Lewis Z, Kalanetra KM, Rashid M, Ahmad SM, Raqib R, Qadri F, Underwood  
555 MA, Mills DA, Stephensen CB. 2014. Stool microbiota and vaccine responses of infants.  
556 *Pediatrics* 134:e362-72.
- 557 46. Sack DA, Qadri F, Svennerholm AM. 2008. Determinants of responses to oral vaccines in  
558 developing countries. *Annales Nestlé (English ed)* 66:71-79.
- 559 47. Moon C, Baldridge MT, Wallace MA, D CA, Burnham, Virgin HW, Stappenbeck TS. 2015.  
560 Vertically transmitted faecal IgA levels determine extra-chromosomal phenotypic  
561 variation. *Nature* 521:90-93.
- 562 48. Smith MI, Yatsunenkov T, Manary MJ, Trehan I, Mkakosya R, Cheng J, Kau AL, Rich SS,  
563 Concannon P, Mychaleckyj JC, Liu J, Houpt E, Li JV, Holmes E, Nicholson J, Knights D,  
564 Ursell LK, Knight R, Gordon JI. 2013. Gut microbiomes of Malawian twin pairs discordant  
565 for kwashiorkor. *Science* 339:548-54.

- 566 49. Round JL, Mazmanian SK. 2009. The gut microbiota shapes intestinal immune responses  
567 during health and disease. *Nat Rev Immunol* 9:313-23.
- 568 50. Beura LK, Hamilton SE, Bi K, Schenkel JM, Odumade OA, Casey KA, Thompson EA, Fraser  
569 KA, Rosato PC, Filali-Mouhim A, Sekaly RP, Jenkins MK, Vezys V, Haining WN, Jameson  
570 SC, Masopust D. 2016. Normalizing the environment recapitulates adult human immune  
571 traits in laboratory mice. *Nature* 532:512-6.
- 572 51. Ivers LC, Charles RC, Hilaire IJ, Mayo-Smith LM, Teng JE, Jerome JG, Rychert J, LaRocque  
573 RC, Xu P, Kovac P, Ryan ET, Qadri F, Almazor CP, Franke MF, Harris JB. 2015.  
574 Immunogenicity of the Bivalent Oral Cholera Vaccine Shanchol in Haitian Adults With  
575 HIV Infection. *J Infect Dis* 212:779-83.
- 576 52. Rakoff-Nahoum S, Paglino J, Eslami-Varzaneh F, Edberg S, Medzhitov R. 2004.  
577 Recognition of commensal microflora by toll-like receptors is required for intestinal  
578 homeostasis. *Cell* 118:229-41.
- 579 53. Ichinohe T, Pang IK, Kumamoto Y, Peaper DR, Ho JH, Murray TS, Iwasaki A. 2011.  
580 Microbiota regulates immune defense against respiratory tract influenza A virus  
581 infection. *Proc Natl Acad Sci U S A* 108:5354-9.
- 582 54. Reikvam DH, Erofeev A, Sandvik A, Grcic V, Jahnsen FL, Gaustad P, McCoy KD,  
583 Macpherson AJ, Meza-Zepeda LA, Johansen FE. 2011. Depletion of murine intestinal  
584 microbiota: effects on gut mucosa and epithelial gene expression. *PLoS One* 6:e17996.
- 585 55. Son MS, Taylor RK. 2011. Vibriocidal assays to determine the antibody titer of patient  
586 sera samples. *Curr Protoc Microbiol Chapter 6:Unit6A 3*.
- 587

**Figure 1**

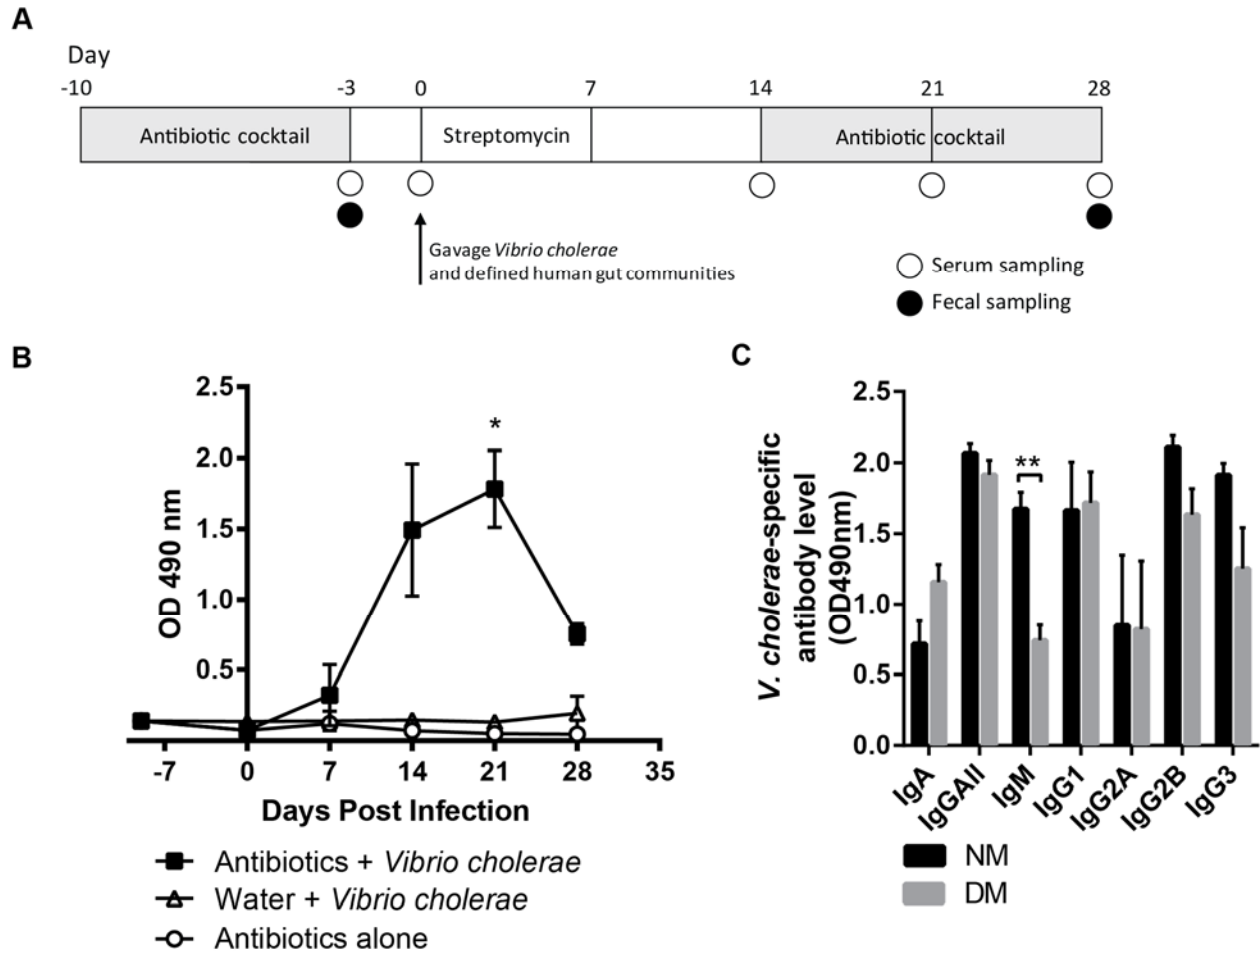

588

589 FIG 1 *V. cholerae*-specific antibody levels in fecal and serum-specific samples. (A) Schematic of antibiotic

590 treatment in SPF CD-1 mice. (B) Post-immunization vibriospecific fecal IgA increased in the

591 antibiotic treated group as compared to other groups. (C) Serum antibody profiles against

592 whole cell *V. cholerae* 4-weeks post-immunization. NM: normal model microbiome, DM:

593 dysbiotic model microbiome. \*,  $P < 0.05$ , \*\*,  $P < 0.01$ , unpaired Student's *t*-test.

594

595

Figure 2

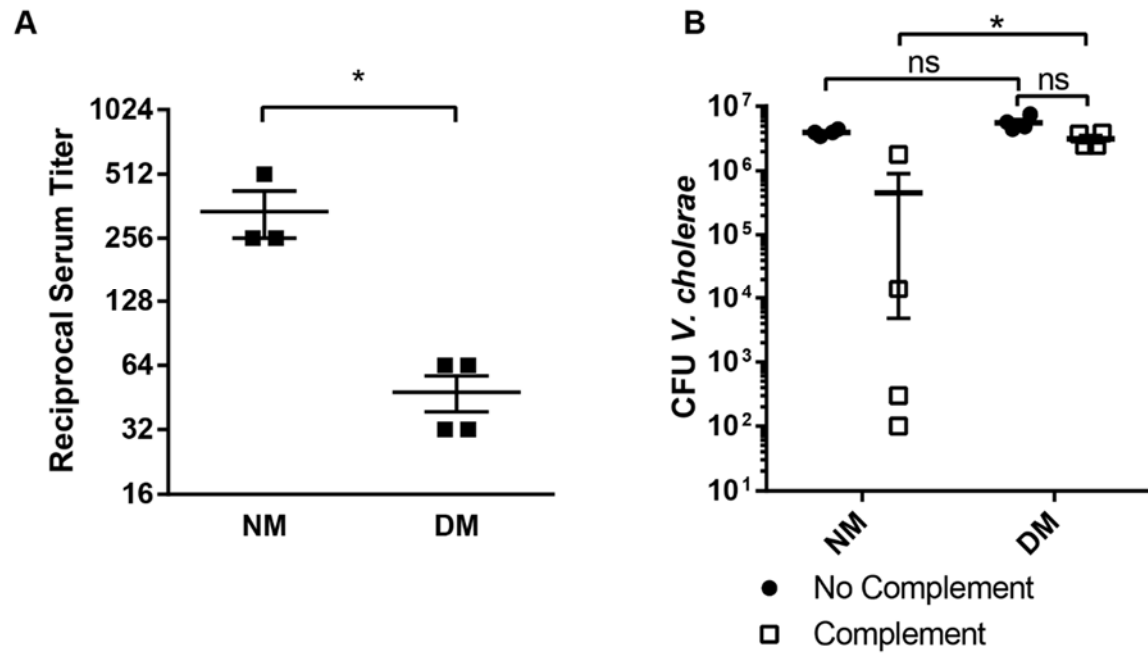

596

597 FIG 2 Serum vibriocidal activity after immunization in presence of normal (NM) and dysbiotic (DM)

598 model human microbiomes in antibiotic-cleared CD-1 mice. (A) Serum vibriocidal titer 4-weeks

599 post-immunization. (B) Levels of *V. cholerae* survival after incubation with serum antibody and

600 exogenous complement. \*,  $P < 0.05$ , Mann-Whitney *U* test.

601

602



Figure 3

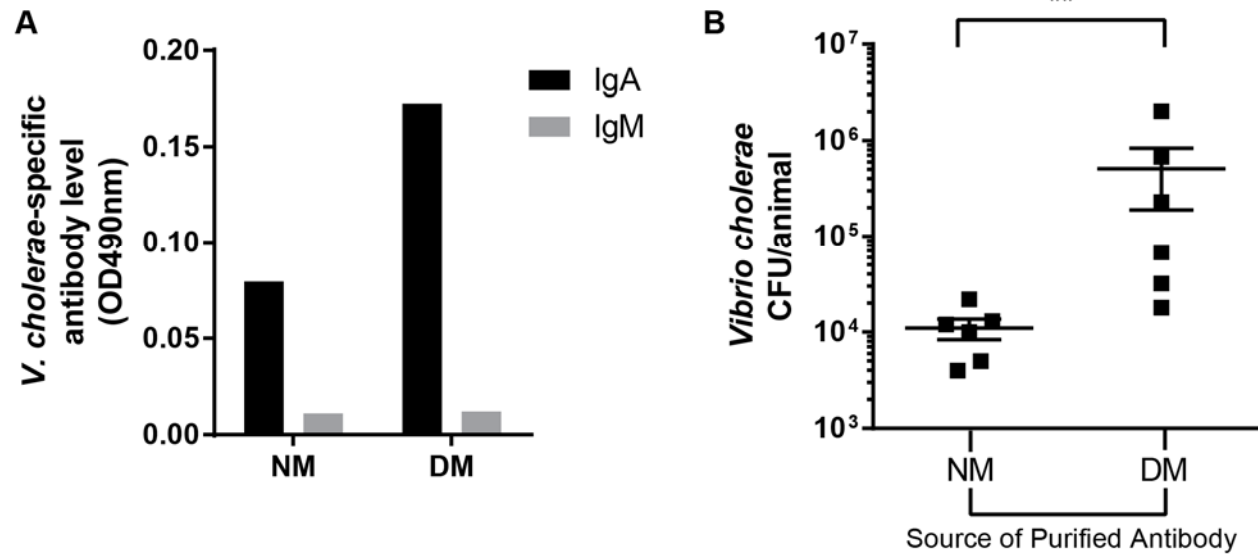

603

604 FIG 3 Purified fecal antibody of immunized NM, but not DM animals, can passively protect

605 suckling animals from *V. cholerae* infection. (A) Isotype distribution of pooled, purified fecal

606 antibodies from NM and DM mice. Input was normalized so NM and DM groups received

607 equivalent amounts of IgA. (B) Colonization of suckling CD-1 mice by *V. cholerae* pre-incubated

608 with purified fecal antibody from immunized mice bearing NM and DM microbiomes. \*\*,

609  $P < 0.01$ , Mann-Whitney  $U$  test.

610

611

Figure 4

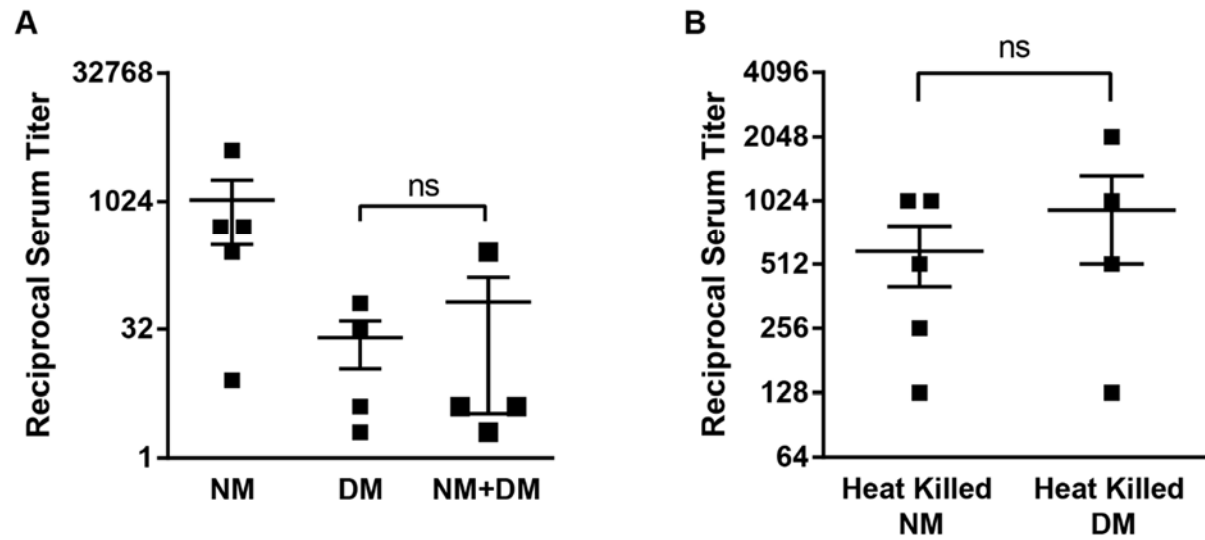

612

613 FIG 4 The effect of DM microbes is dominant on immunization outcomes, and requires the

614 presence of live bacteria during immunization. (A) Serum vibriocidal titers 4-weeks post-

615 immunization in CD-1 mice immunized with *V. cholerae* and bearing indicated human model

616 microbiomes. (B) Vibriocidal titers of mice gavaged with indicated heat-killed communities at

617 time of immunization with live *V. cholerae*. ns,  $P > 0.05$ , Mann-Whitney *U* test.

618

619

Figure 5

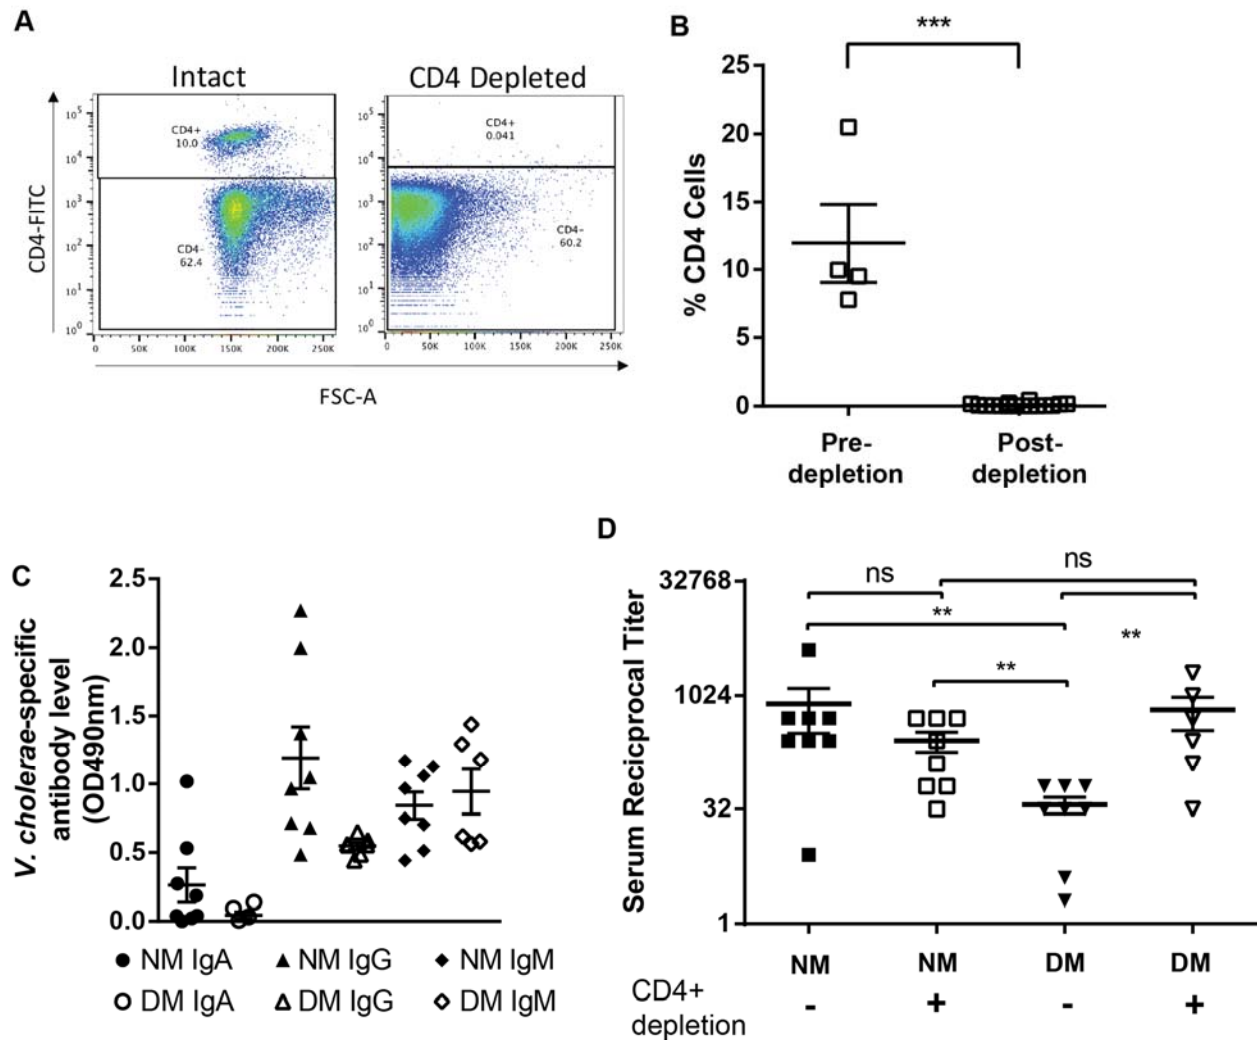

620

621 FIG 5 DM community effects are mediated *in vivo* by CD4<sup>+</sup> cell populations. (A and B) % of CD4

622 cells pre and 7-days post depletion in blood. (C) Serum antibody levels against *V. cholerae* 4-

623 weeks post-immunization in the presence of indicated human model microbiomes. (D)

624 Comparison of vibriocidal titer levels in NM and DM groups X-weeks after immunization with or

625 without CD4<sup>+</sup> cell depletion. \*\*,  $P < 0.01$ , \*\*\*,  $P < 0.001$ , Mann-Whitney *U* test.

626

627

628 TABLE S1 Species used

| Bacterium                                                  | Community | Strain Name  | NCBI<br>Taxonomy<br>ID |
|------------------------------------------------------------|-----------|--------------|------------------------|
| <i>Bacteroides vulgatus</i>                                | NM        | ATCC 8482    | 435590                 |
| <i>Blautia obeum</i>                                       | NM        | ATCC 29174   | 411459                 |
| <i>Clostridium scindens</i>                                | NM        | ATCC 35704   | 411468                 |
| <i>Enterococcus faecalis</i>                               | DM        | OG1RF        | 474186                 |
| <i>Escherichia coli</i>                                    | DM        | DH5 $\alpha$ | 668369                 |
| <i>Streptococcus infantarius</i> subsp. <i>infantarius</i> | DM        | ATCC BAA-102 | 471872                 |
| <i>Streptococcus salivarius</i> subsp. <i>salivarius</i>   | DM        | ATCC 13419   | 1304                   |
| <i>Streptococcus salivarius</i> subsp. <i>thermophilus</i> | DM        | DSM 20617    | 1091038                |

629
